# Supplementary material for: Classification of Drugs Based on Properties of Sodium Channel Inhibition: A Comparative Automated Patch-Clamp Study
Source: PLOS journal article supplement (doi:10.1371/journal.pone.0015568), 2010-12-20

## Materials and Methods S3 – Reliability of IC<sub>50</sub> calculation from single-concentration inhibition values.

### *Examples for the calculation of IC<sub>50</sub> values from single concentration measurements*

Examples for the effect of 100, 300 and 1000  $\mu\text{M}$  of lidocaine are illustrated on **A**, **B**, **C**.

Average inhibition (diamonds in **D**) was  $0.09 \pm 0.02$ ,  $0.23 \pm 0.02$  and  $0.44 \pm 0.01$  ( $n = 5$  to  $7$ ), from which the calculated IC<sub>50</sub> values are 1048, 977 and 1268  $\mu\text{M}$ , respectively. Right panel illustrates concentration response curves extrapolated from the three single-concentration measurements with the calculated IC<sub>50</sub> values indicated (red '+' marks).

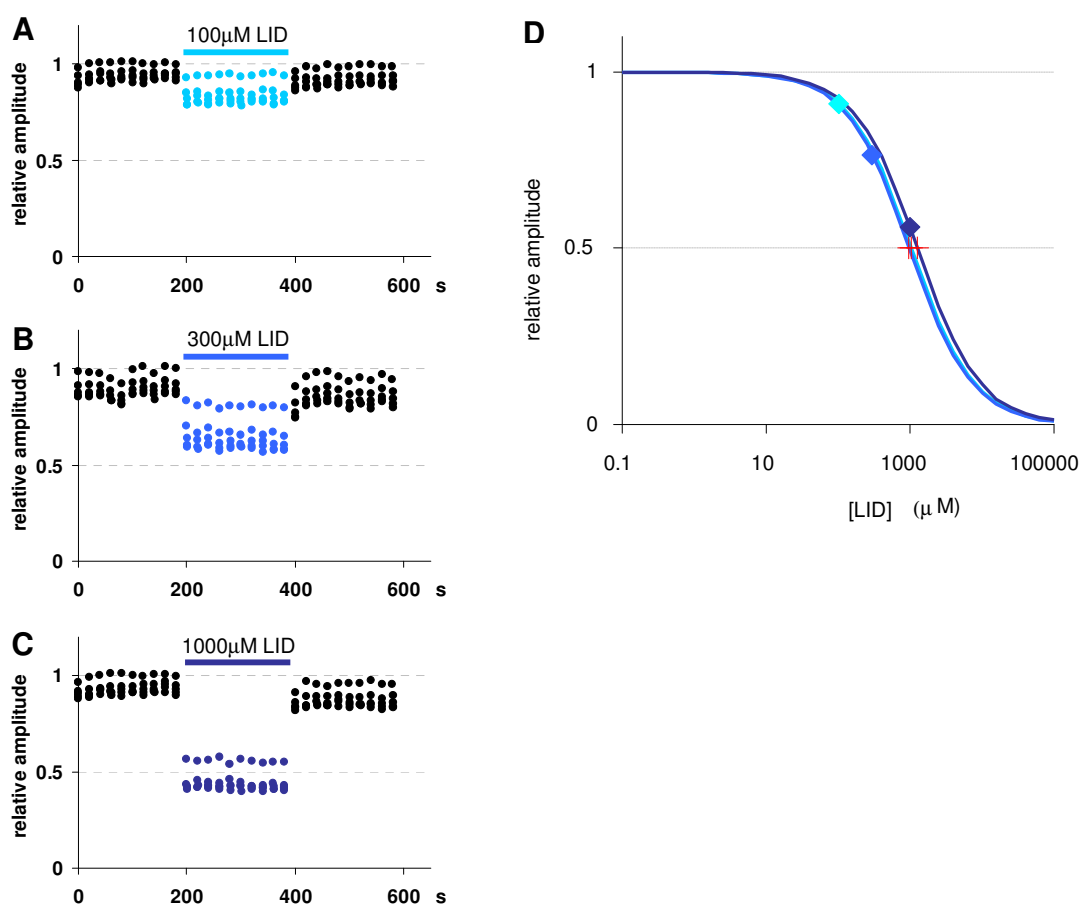

Supplement: S3 (10.1371/journal.pone.0015568.s003) [file journal.pone.0015568.s003]
